# Supplementary material
Source: publisher site journal article supplement (https://www.dovepress.com/article/306526)
Supplement: Supplementary file 1 [file get_supplementary_file.php]

**Supplementary Data**

# **Chitosan/gold Hybrid Nanoparticles Enriched Electrospun PVA Nanofibrous Mats for the Topical Delivery of *Punica granatum* L. Extract: Synthesis, Characterization, Biocompatibility and Antibacterial Properties**

Mohamed A. Mohamady Husseina,#, [Songul Ulag](https://www.sciencedirect.com/science/article/pii/S0921510720301677" \l "!) b, Ahmed S. Abo Dena c [
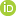
](https://orcid.org/0000-0001-9624-4656), Ali Sahin d, Mariusz Grinholc e, [Oguzhan Gunduz](https://www.sciencedirect.com/science/article/pii/S0921510720301677" \l "!) b,f, Ibrahim M. El-Sherbinyc,*, Mosaad Megahed a

a Clinic of Dermatology, University Hospital of Aachen, Aachen 52074, Germany

b Center for Nanotechnology & Biomaterials Application and Research (NBUAM), Marmara University, Istanbul 34722, Turkey

c Nanomedicine Laboratory, Center for Materials Science (CMS), Zewail City of Science and Technology, 6th of October, Giza 12578, Egypt

d Department of Biochemistry, School of Medicine, Genetic and Metabolic Diseases Research and Investigation Center, Marmara University, Istanbul 34722, Turkey

e Laboratory of Molecular Diagnostics, Department of Biotechnology, Intercollegiate Faculty of Biotechnology, University of Gdansk, Gdansk, Poland

f Department of Metallurgical and Materials Engineering, Faculty of Technology, Marmara University, Istanbul 34722, Turkey

*Corresponding author:

Prof. Ibrahim M. El-Sherbiny,

Center for Materials Sciences,

Zewail City of Science and Technology

Email: [ielsherbiny@zewailcity.edu.eg](mailto:ielsherbiny@zewailcity.edu.eg)

*Co-corresponding author:

Mohamed A. Mohamady Hussein

University Hospital of Aachen, Aachen 52074, Germany

Email: [almohammadeymr2023@gmail.com](mailto:almohammadeymr2023@gmail.com)


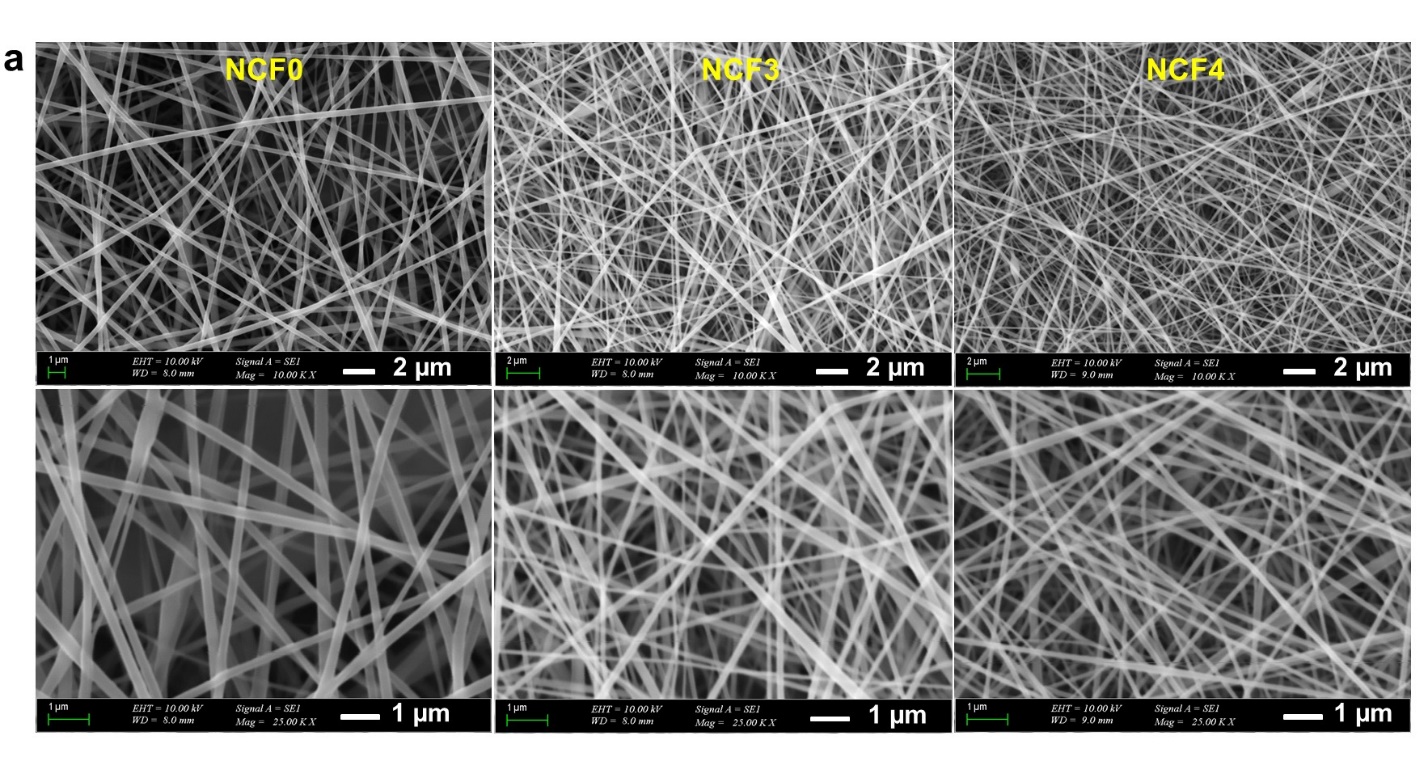
**Figure S1** SEM micrographs of non-crosslinked Nanofibrous mats: NCF0, NCF3 and NCF4


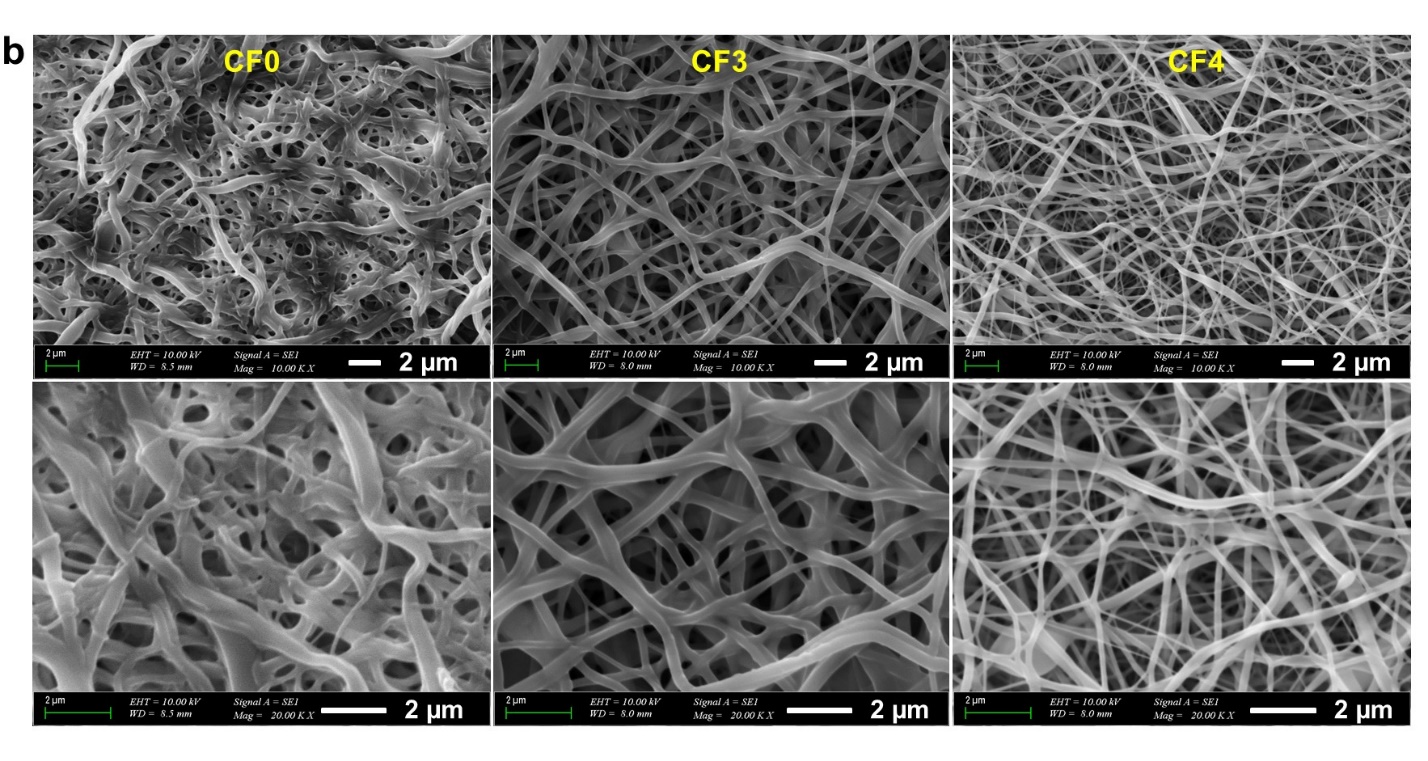
**Figure S2** SEM micrographs of crosslinked Nanofibrous mats: CF0, CF3 and CF4


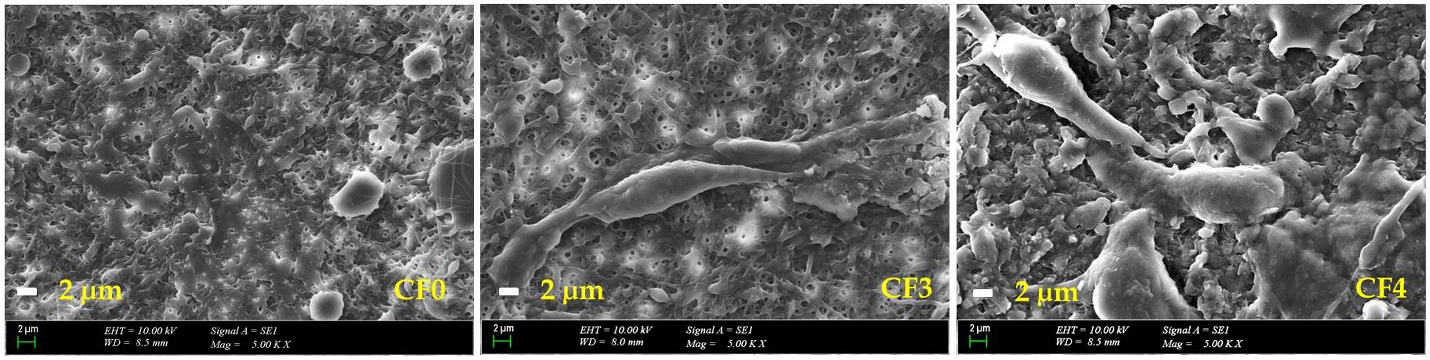


**Figure S3** SEM micrographs display cell proliferation and adhesion over CF0, CF3 and CF4 NFs.
